# Supplementary material
Source: publisher site journal article supplement (https://www.dovepress.com/article/450217)
Supplement: Supplementary file 1 [file get_supplementary_file.php]

# Longitudinal Problematic Social Media Use in Students and Its Associated Increase in Negative Mental Health Outcomes: Supplementary Material

**Table S1**. Most used social media platforms reported at baseline for all participants.

| Most Used Social Media Platform | Number of Participants |
| --- | --- |
| Instagram | 40 |
| Snapchat | 18 |
| TikTok | 16 |
| Facebook | 9 |
| Reddit | 5 |
| Twitter | 4 |
| Whatsapp | 4 |
| Youtube | 3 |
| Discord | 2 |
| Do Not Use Social Media | 2 |

**Table S2**. Mental health outcomes and social media use at baseline.

| Mean (SD) | **Baseline**  **(*N* = 103)** | **Longitudinal subgroup**  **(*N* = 78)** | **p-value** |
| --- | --- | --- | --- |
| Depression (HDRS) | 8.25 (5.46) | 6.65 (5.2) | 0.46 |
| Anxiety (GAD) | 6.54 (4.74) | 5.40 (4.32) | 0.91 |
| Stress (PSS) | 17.82 (6.73) | 16.88 (6.63) | 0.88 |
| Resilience (BRS) | 3.46 (0.66) | 3.45 (0.58) | 0.99 |
| Loneliness (UCLA) | 38.15 (12.03) | 37.29 (12.50) | 0.52 |
| Problematic Use (BSMAS) | 36.65 (10.51) | 34.68 (10.43) | 0.70 |
| Frequency of Use | 3.81 (1.86) | 3.62 (1.85) | 0.50 |

Mean total scores of mental health outcomes and social media use at baseline in each of the participant groups.
